# Supplementary material for: Strategic Tillage Effects on Crop Yields, Soil Properties, and Weeds in Dryland No-Tillage Systems
Source: MDPI journal article supplement (doi:10.3390/agronomy11040662), 2021-03-31
Supplement: s1 [file s1]

# Supplementary Materials: Strategic Tillage Effects on Crop Yields, Soil Properties, and Weeds in Dryland No-Tillage Systems

Augustine K. Obour\*, Johnathon D. Holman, Logan M. Simon and Alan J. Schlegel

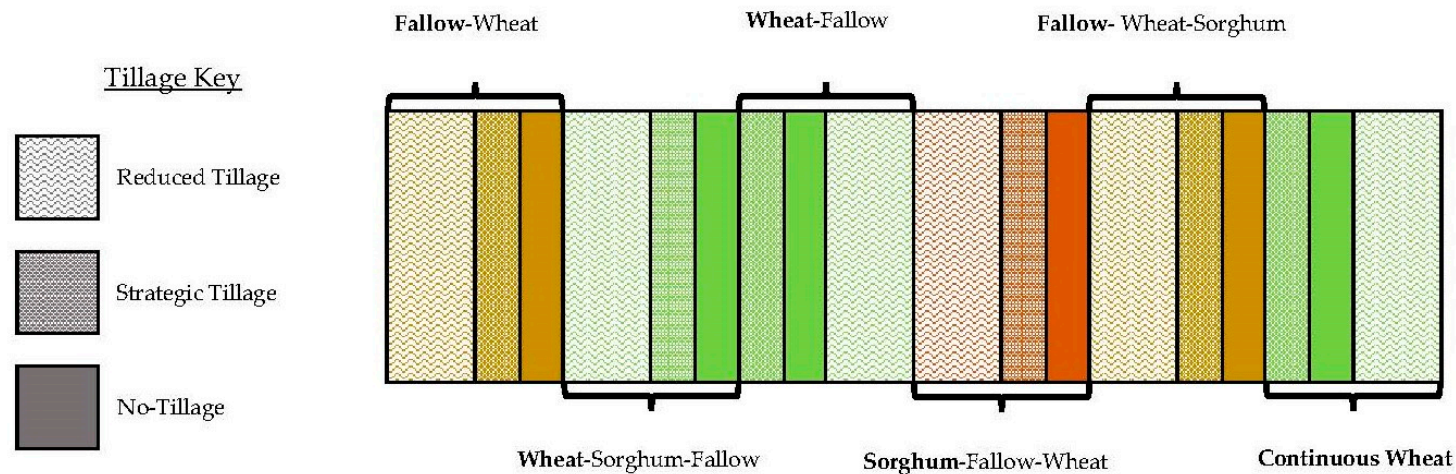

**Figure S1.** Experimental layout of one replication with crop rotation and tillage systems randomized. Bolded letters within each crop rotation label indicate crop phases (wheat, sorghum, or fallow). Tillage operations (reduced tillage, strategic tillage or no-tillage) is indicated by different patterns.

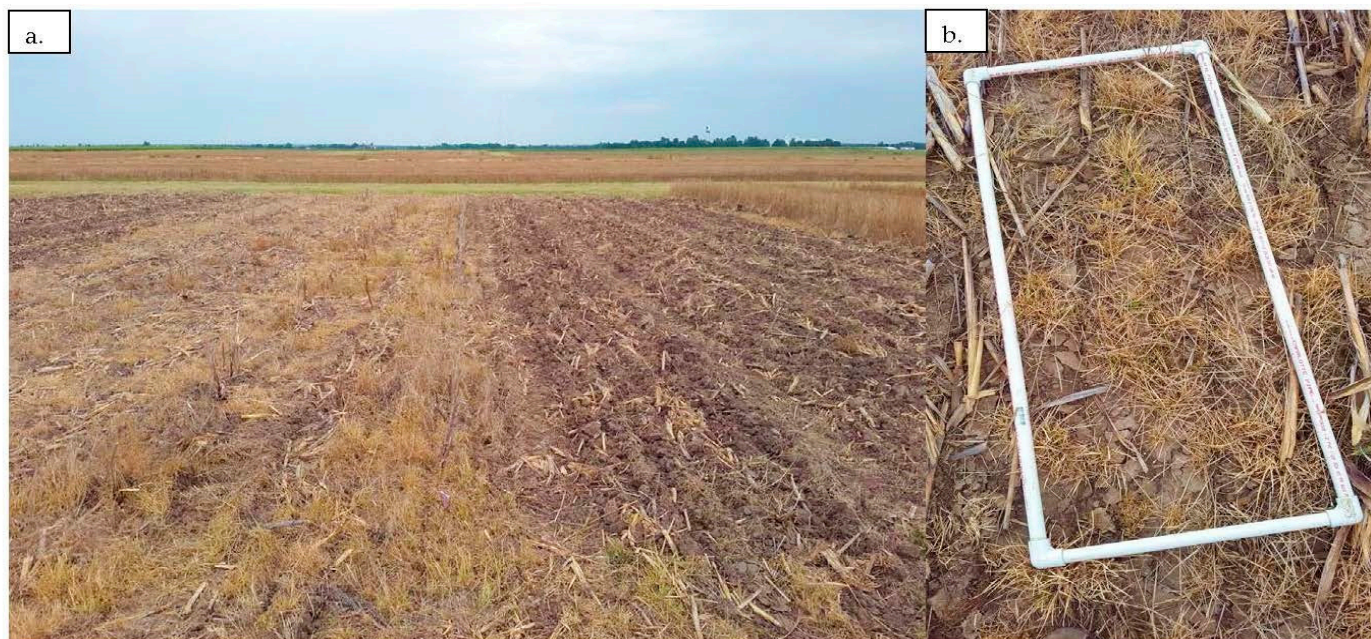

**Figure S2.** No-till (a, left) and strategic tillage (a, right) following tillage and fertilizer applications in fallow. A 1 m<sup>2</sup> quadrat (b) in the field to measure density of herbicide toler-ant windmill grass and other annual weeds.
